# Supplementary material for: Unraveling the Genetic Blueprint of Doxorubicin-Induced Cardiotoxicity Through Systems Genetics Approaches
Source: Research Square preprint supplement (doi:10.21203/rs.3.rs-6224399/v1), 2025-04-15
Supplement: Supplementary file 1 [file 360ed823e57b80bec7fabdfd.docx]

**Supplementary Figure 1.**


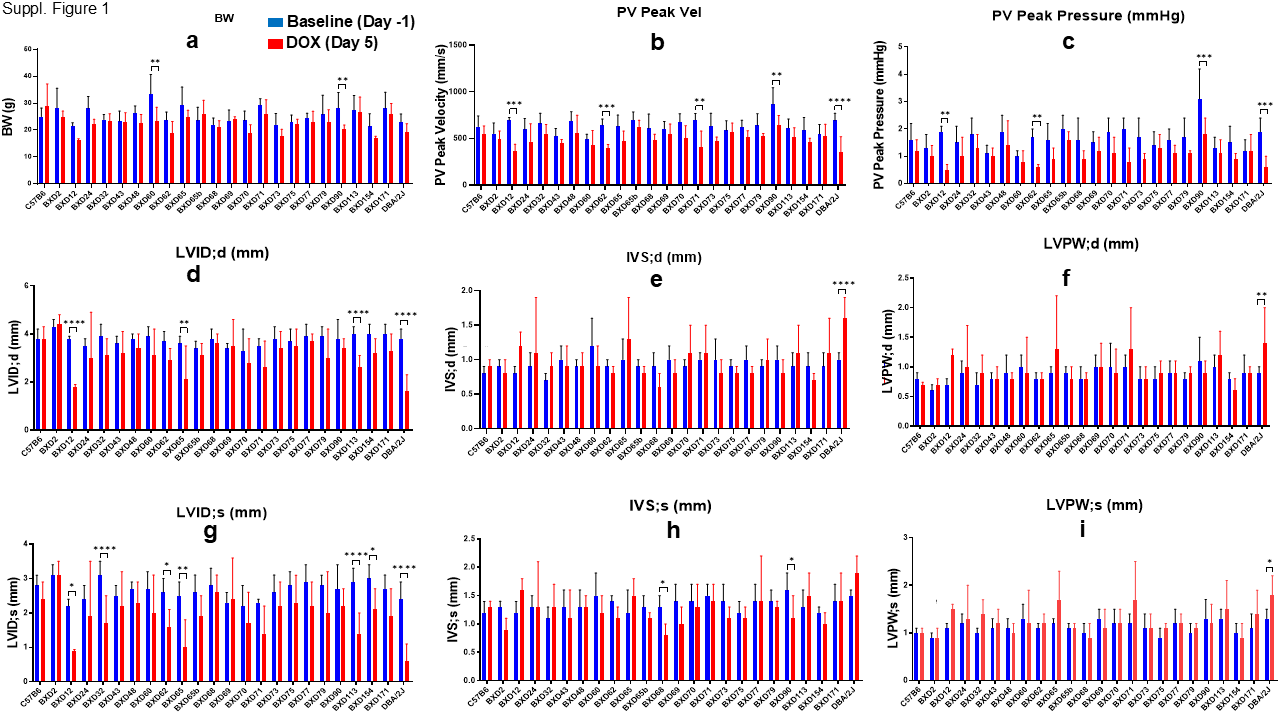


**Supplementary Figure 1.** Results of echocardiographic assessment of heart function in BXDs treated with DOX.

Values on Y-axis represent: **a)** mean body weight (BW) in grams (g); **b)** pulmonary vein (PV) peak velocity (mm/sec); **c)** PV peak pressure (mmHg); **d)** left ventricular (LV) internal diameter (ID) (mm); **e)** interventricular septum (IVS) thickness (mm); **f)** LV posterior wall (PW) thickness (mm) at diastole (d); **g)** LVID, **h)** IVS thickness and **i)** LVPW thickness at systole (s) among BXDs (X-axis) at baseline (Day -1, blue columns) compared to Day 5 post-DOX treatment (red columns). Asterisks denote significant differences between Day -1 and Day 5.
